# Supplementary material for: Mutations Utilize Dynamic Allostery to Confer Resistance in TEM-1 β-lactamase
Source: MDPI journal article supplement (doi:10.3390/ijms19123808), 2018-11-29
Supplement: s1 [file s1]

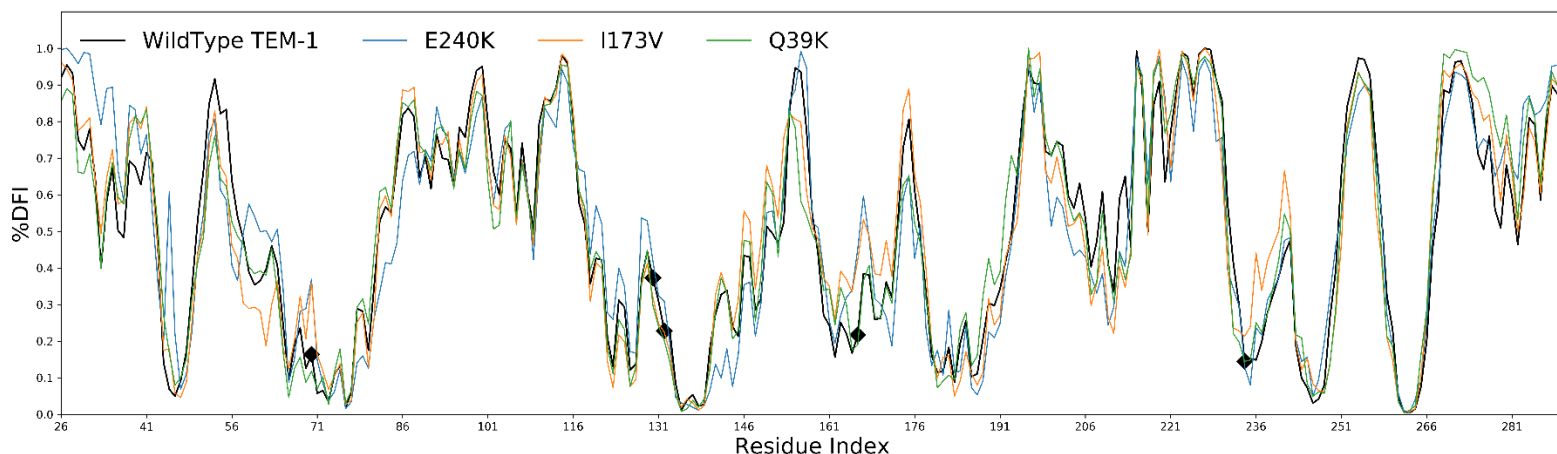

**Supplementary Figure 1.** Comparison of %DFI profiles of wildtype TEM-1  $\beta$ -lactamase (Black) with the %DFI profiles of single point variants which provide resistance to  $\beta$ -lactam antibiotics. We observe that a majority of mutants, despite being distal to the active site region, alter the flexibility of the active site regions (in Black Diamonds) particularly at S70 and E166.

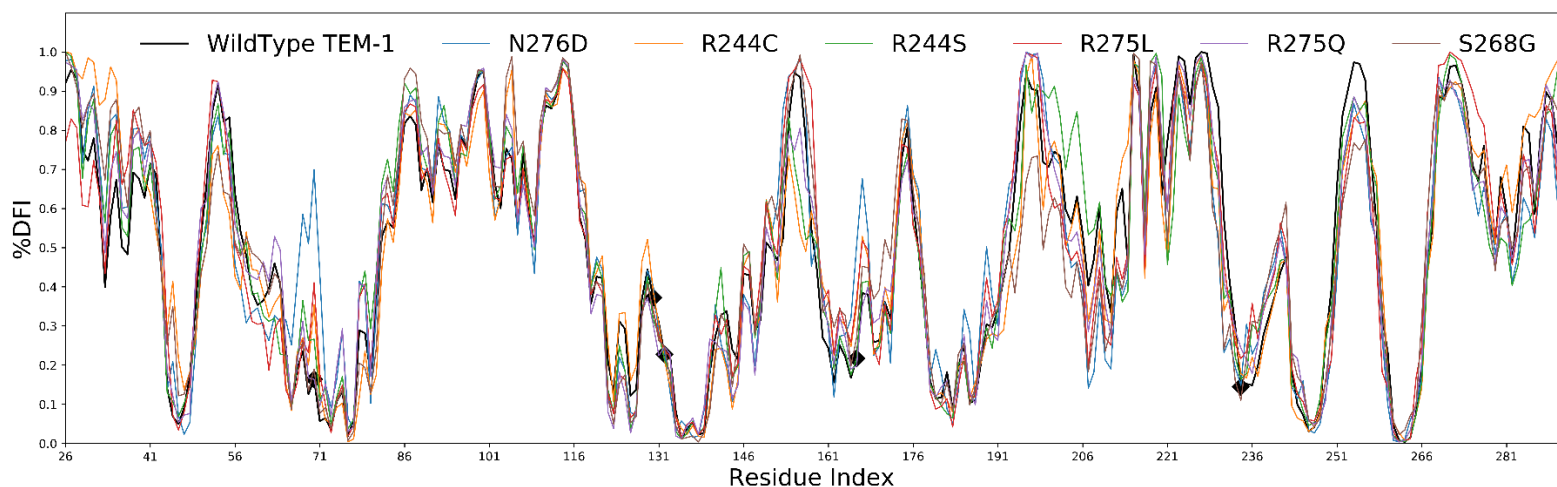

**Supplementary Figure 2.** Comparison of %DFI profiles of wildtype TEM-1  $\beta$ -lactamase (Black) with the %DFI profiles of single point variants which impact antibiotic resistance through inhibitors. We observe that a majority of mutants, despite being distal to the active site region, alter the flexibility of the active site regions (in Black Diamonds) particularly at S70 and E166.
